# Supplementary material for: Discovery of a Novel Microtubule Targeting Agent as an Adjuvant for Cancer Immunotherapy
Source: Hindawi journal article supplement (doi:10.1155/2018/8091283), 2018-10-10
Supplement: f1 [file 8091283.f1.pdf]

Supplementary Figure 1

Fused naphthalene

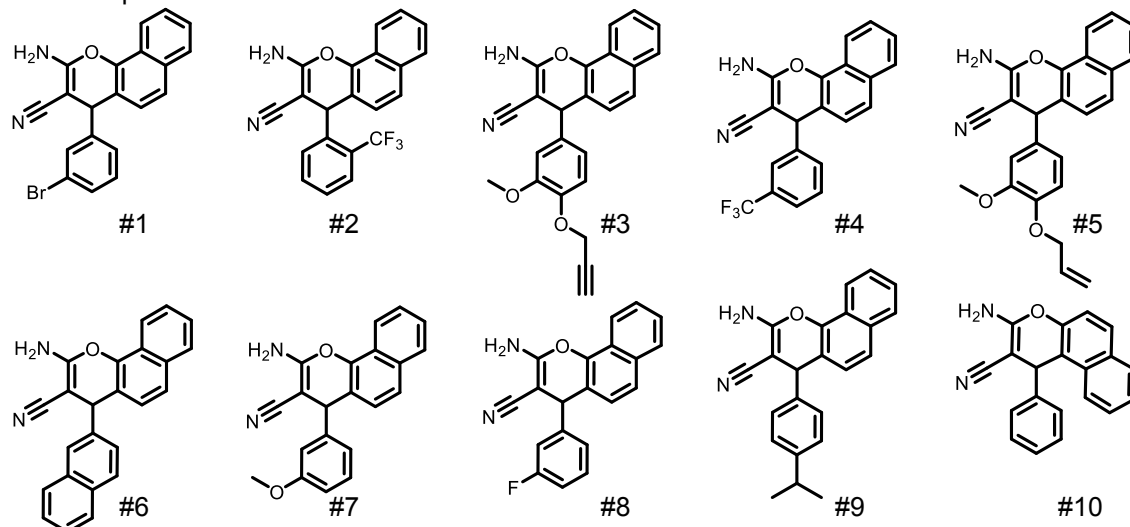

Fused pyrazole

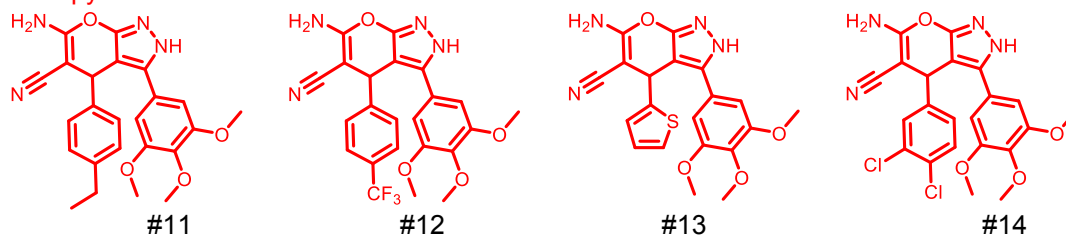

Fused dimethylaminobenzene

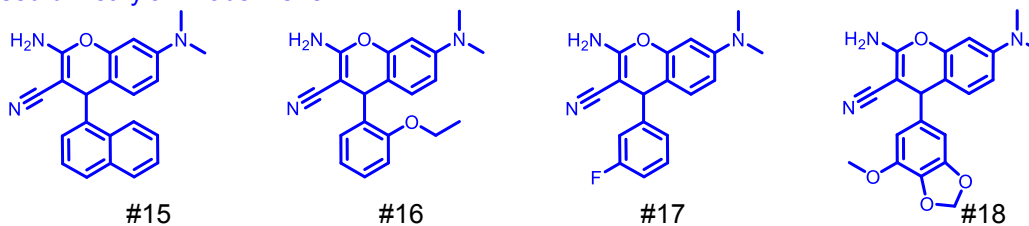

Fused benzodioxolane

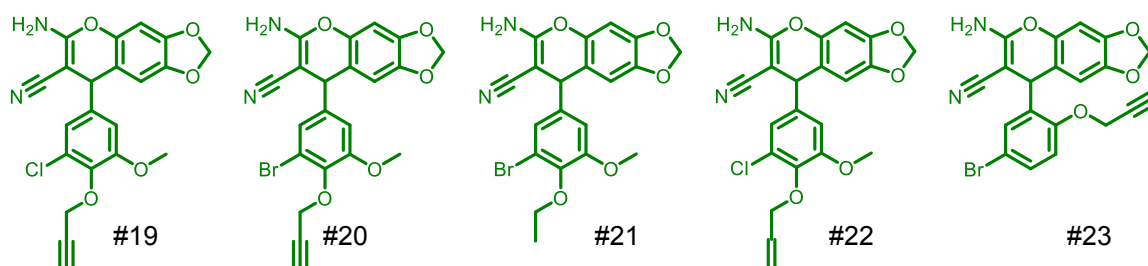

Supplementary Figure 2

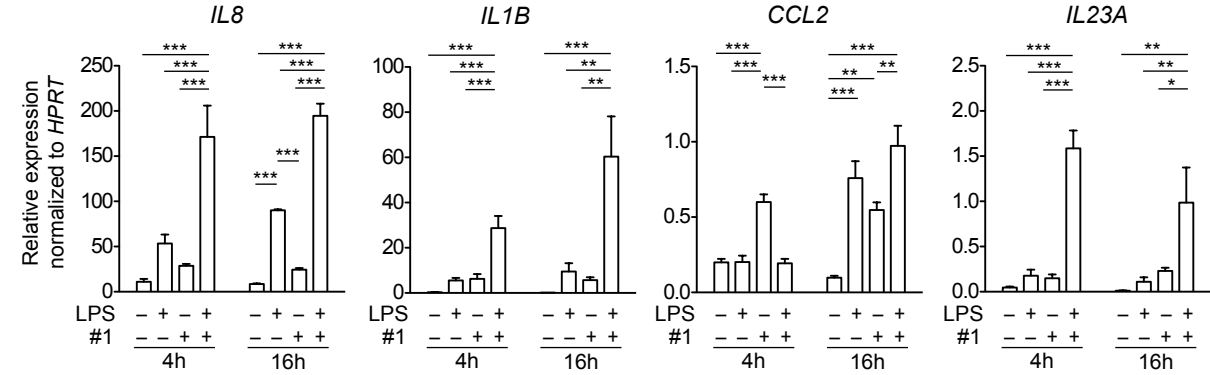

Supplementary Figure 3

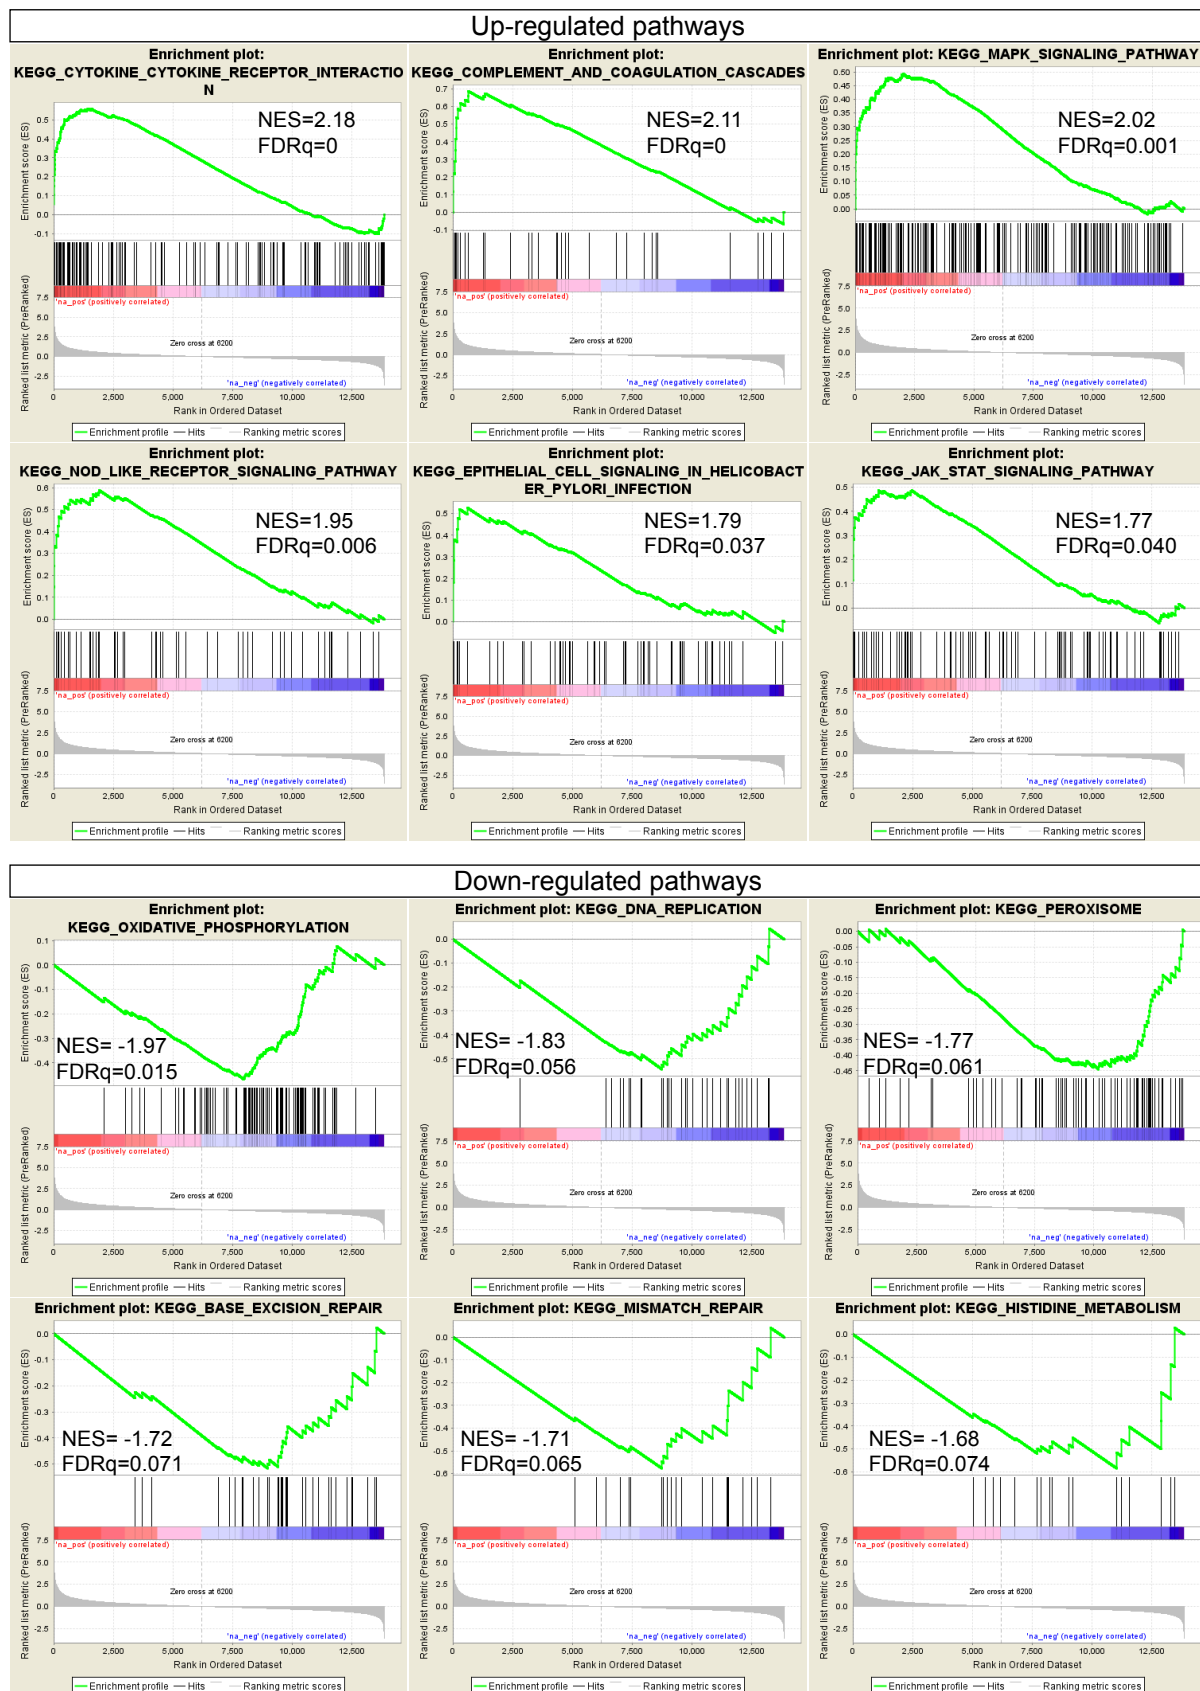

Supplementary Figure 4

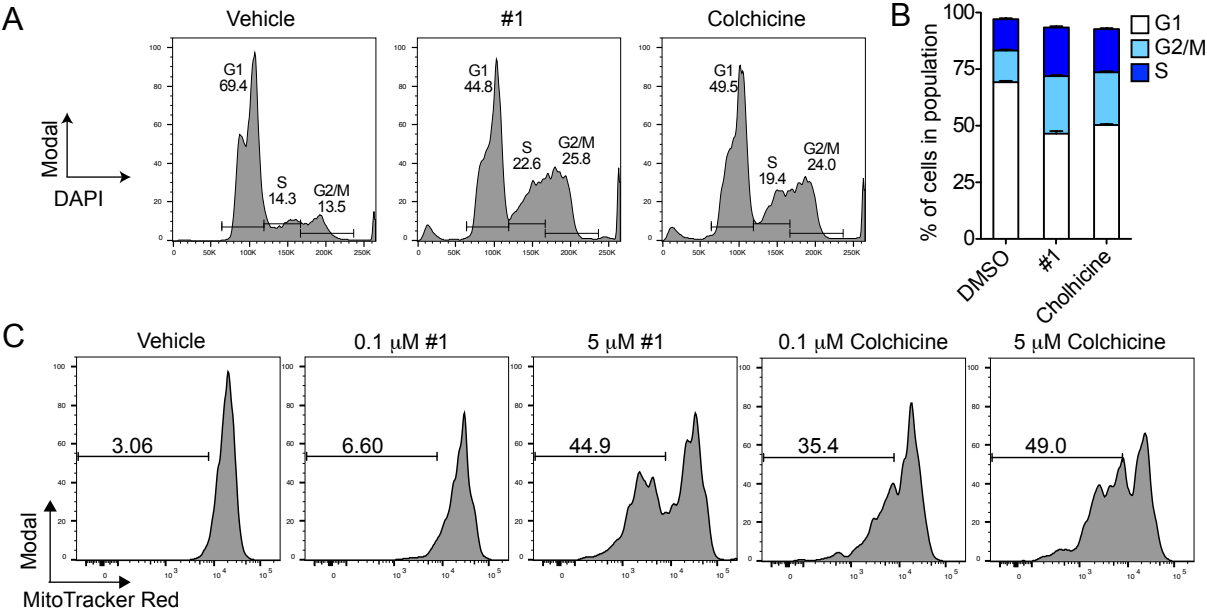

Supplementary Figure 5

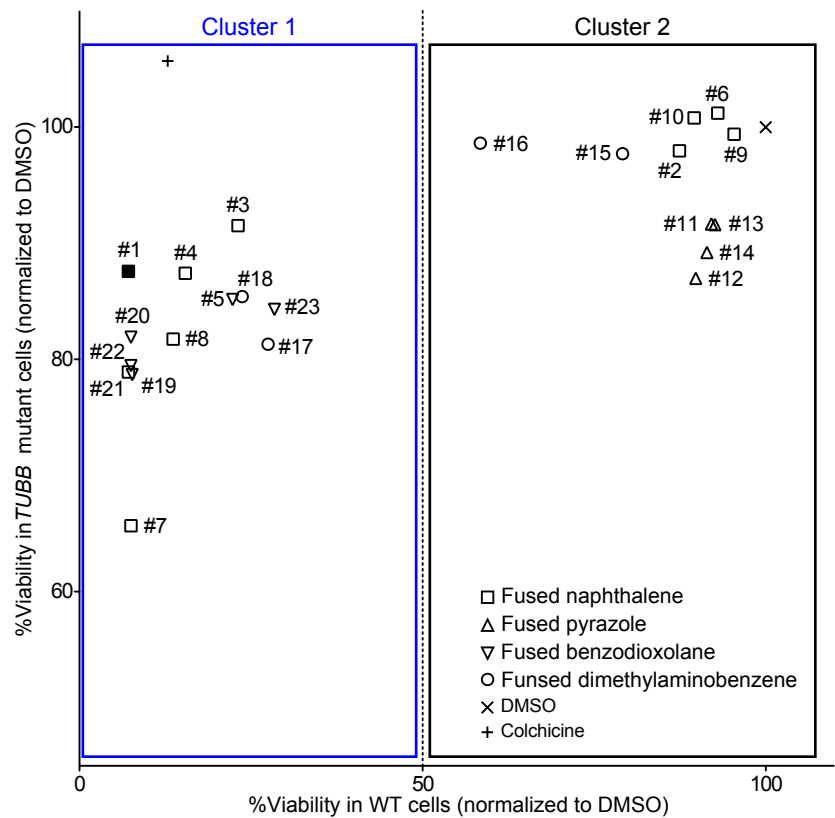

Supplementary Figure 6

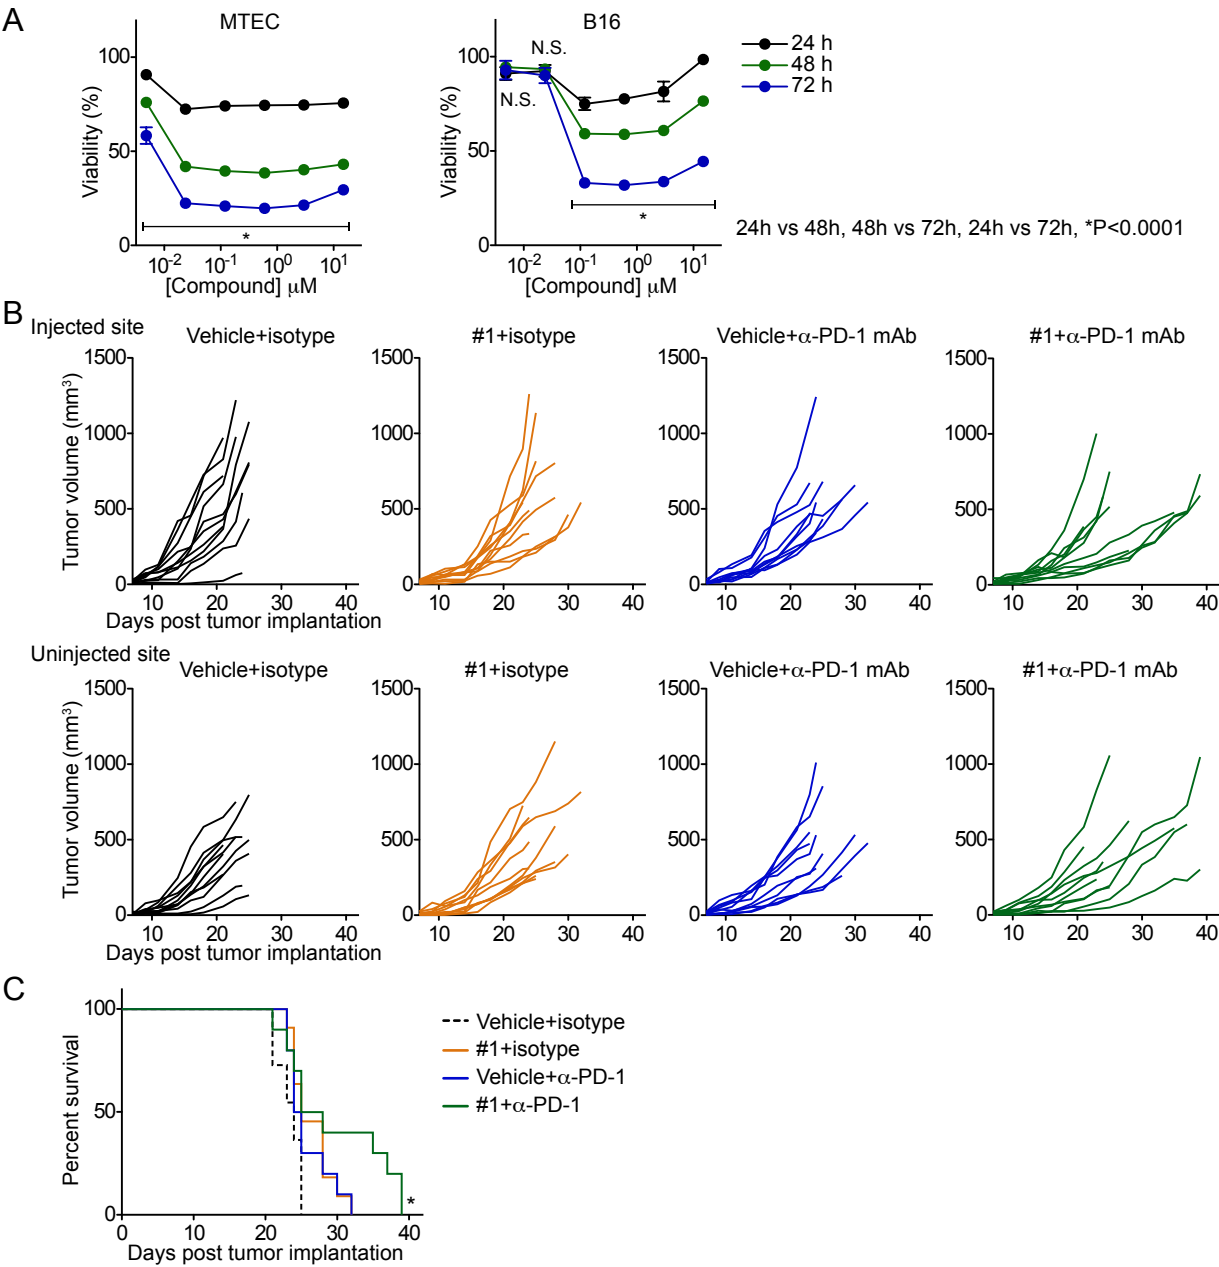

Supplementary Figure 7

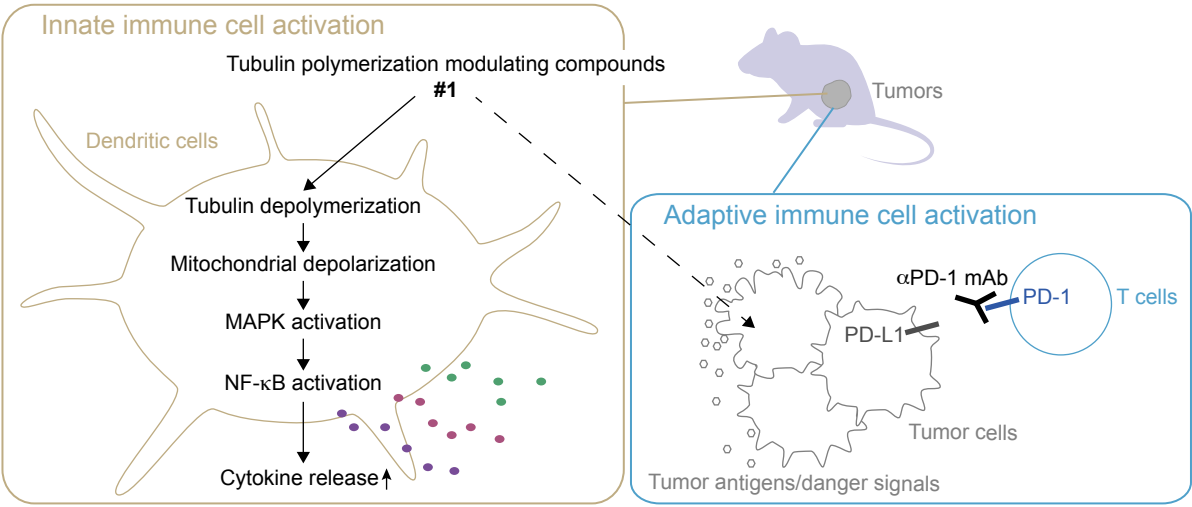

## Supplementary Figures

**Supplementary Figure 1. Structures of select purchased 4*H*-chromene-3-carbonitriles.**

**Supplementary Figure 2.** Quantitative RT-PCR of gene expression of *IL8*, *IL1B*, *CCL2* and *IL23A* in THP-1 cells. THP-1 cells were treated with 5  $\mu$ M **#1** in the presence and absence of LPS for 4 and 16 h. Expressions of *IL8*, *IL1B*, *CCL2* and *IL23A* were measured by quantitative RT-PCR and the levels were normalized to HPRT. \**P*<0.05, \*\**P*<0.01, \*\*\**P*<0.0001 by one-way ANOVA with Tukey's *post hoc* test.

**Supplementary Figure 3.** RNA-seq data was analyzed by enrichment method using KEGG pathway database. THP-1 cells were incubated with compound **#1** for 5 h and RNA was isolated. RNA-seq was performed by La Jolla Institute Next Generation Sequencing Facility. The most significantly up-regulated (upper panels) and down-regulated pathways (lower panels) are shown (FDR *q*<0.05).

**Supplementary Figure 4.** Compound **#1** induces cell cycle arrest at the G2/M phase and mitochondrial depolarization in THP-1 cells. (A) Representative histograms of cell cycle analysis.  $5 \times 10^4$  THP-1 cells cultured with 5  $\mu$ M **#1**, or colchicine overnight. After fixation with 70% ethanol, cells were washed with PBS and stained with 10  $\mu$ g/ml of DAPI for 15 min at room temperature and flow cytometry analysis was performed. (B) Distribution (%) of cells in G1, G2/M and S phases. Data presented are representative of two independent experiments showing similar results. (C) THP-1 cells were treated with 0.1 or 5  $\mu$ M **#1**, or colchicine for 72 h and stained with MitoTracker Red, which stains mitochondria in a membrane potential dependent manner. Cells were analyzed by flow cytometry and representative histograms are shown.

**Supplementary Figure 5.** Detailed compound distribution of Figure 4B. The individual compound IDs are labeled next to their respective symbols from the plot in Figure 4B.



**Supplemental Figure 6.** Anti-tumor effects of compound **#1**. (A) Cytotoxicity of **#1** increased in a time-dependent manner.  $10^5$  cells/mL HPV negative MTECs or B16-OVA cells were cultured for 24 h (black), 48 h (green) and 72 h (blue) with serially diluted compound **#1** from 15  $\mu$ M. At the indicated times cell viability was tested by MTT assay as described in the methods. Comparisons among 24 h, 48 h and 72 h at each concentration were examined by one-way ANOVA with Tukey's *post hoc* test. (\* $P < 0.0001$ , N.S.: not significant). (B) Tumor growth curves from individual mice in Figure 6F are shown. (C) Kaplan-Meier survival curves of each treatment group are shown. Mice that received combination treatment survived longer compared to vehicle treated mice [\* $P < 0.05$  by Log-rank (Mantel-Cox) test].

**Supplemental Figure 7.** Model of functional activity for compound **#1**. Compound **#1** inhibits intracellular beta-tubulin polymerization, which is associated with mitochondrial depolarization and cell cycle arrest. Mitochondrial distress initiates a cascade of MAPK and NF- $\kappa$ B activation which results in cytokine/chemokine release. Intratumor injection of compound **#1** activates APCs in the tumor microenvironment and concurrently induces the release of tumor-antigens, which provides the stimulus of tumor-specific cellular responses.

**Supplementary Table 1. Substructure based classification of 4*H*-chromene-3-carbonitriles into major groups**

| Group                  | Fused scaffold name               | Total # of compounds | NF-κB HTS <sup>a)</sup> | ISRE HTS <sup>a)</sup> |
|------------------------|-----------------------------------|----------------------|-------------------------|------------------------|
| <b>1 <sup>b)</sup></b> | <b>Fused naphthalene</b>          | <b>41</b>            | <b>1</b>                | <b>8</b>               |
| <b>2 <sup>b)</sup></b> | <b>Fused pyrazole</b>             | <b>706</b>           | <b>8</b>                | <b>1</b>               |
| <b>3 <sup>b)</sup></b> | <b>Fused benzodioxolane</b>       | <b>12</b>            | <b>1</b>                | <b>3</b>               |
| <b>4 <sup>b)</sup></b> | <b>Fused dimethylaminobenzene</b> | <b>20</b>            | <b>0</b>                | <b>6</b>               |
| 5                      | Other substituted Fused Benzene   | 107                  | 1                       | 1                      |
| 6                      | Fused 4-phenyl-5-carboxy          | 524                  | 1                       | 0                      |
| 7                      | Fused 4-heteroaryl-5-carboxy      | 174                  | 0                       | 0                      |
| 8                      | Fused pyrimidine                  | 48                   | 0                       | 0                      |
| 9                      | Fused imidazole                   | 13                   | 0                       | 1                      |
| 10                     | Fused piperidine                  | 22                   | 1                       | 0                      |
| 11                     | Fused quinoline                   | 23                   | 0                       | 0                      |
| 12                     | Fused thiophene                   | 27                   | 0                       | 0                      |
| 13                     | Fused pyridine                    | 16                   | 0                       | 0                      |
| 14                     | Others                            | 45                   | 0                       | 0                      |
| <i>Total</i>           |                                   | <i>1778</i>          | <i>13</i>               | <i>20</i>              |

<sup>a)</sup> Number of compounds with % activation > 90% in individual screens.

<sup>b)</sup> Four groups having more than 2 compounds with “% activation” values greater than 90% full activation in either of the HTS screens were selected.

**Supplementary Table 2. Bioactivities for 4*H*-chromene-3-carbonitriles**

| Compound ID <sup>a)</sup> | THP-1 NF-κB Reporter cells<br>SEAP (μg/mL) |                          | mBMDc<br>IL-12 (ng/mL)   |
|---------------------------|--------------------------------------------|--------------------------|--------------------------|
|                           | without LPS                                | with LPS                 | with LPS                 |
|                           | Mean ± SEM <sup>b)</sup>                   | Mean ± SEM <sup>c)</sup> | Mean ± SEM <sup>c)</sup> |
| #1                        | 0.06 ± 0.01*                               | 3.25 ± 0.45**            | 9.42 ± 0.42**            |
| #2                        | 0.03 ± 0                                   | 2.33 ± 0.34              | 2.87 ± 0.2               |
| #3                        | 0.05 ± 0.01                                | 3.06 ± 0.31**            | 7.17 ± 0.62**            |
| #4                        | 0.03 ± 0                                   | 2.92 ± 0.4**             | 9.65 ± 0.82**            |
| #5                        | 0.09 ± 0.02**                              | 3.6 ± 0.3**              | 5.6 ± 0.14**             |
| #6                        | 0.02 ± 0                                   | 2.25 ± 0.34              | 1.77 ± 0.06***           |
| #7                        | 0.05 ± 0.01                                | 3.16 ± 0.35**            | 6.76 ± 0.13**            |
| #8                        | 0.05 ± 0.01                                | 3.18 ± 0.23**            | 8.18 ± 0.13**            |
| #9                        | 0.02 ± 0                                   | 1.45 ± 0.23              | 1.34 ± 0.19***           |
| #10                       | 0.03 ± 0                                   | 1.82 ± 0.21              | 1.81 ± 0.21***           |
| #11                       | 0.02 ± 0                                   | 1.11 ± 0.11              | 2.05 ± 0.05              |
| #12                       | 0.02 ± 0                                   | 1.21 ± 0.11              | 0.99 ± 0.02***           |
| #13                       | 0.02 ± 0                                   | 1.85 ± 0.43              | 0.3 ± 0.02***            |
| #14                       | 0.02 ± 0                                   | 1.49 ± 0.42              | 0.68 ± 0.22***           |
| #15                       | 0.03 ± 0.01                                | 2.65 ± 0.43*             | 2.41 ± 0.11              |
| #16                       | 0.03 ± 0.01                                | 2.57 ± 0.42              | 2.19 ± 0.09***           |
| #17                       | 0.04 ± 0.01                                | 2.88 ± 0.35**            | 2.84 ± 0.07              |
| #18                       | 0.06 ± 0.01                                | 3.77 ± 0.35**            | 5.39 ± 0.1**             |
| #19                       | 0.09 ± 0.03*                               | 3.52 ± 0.32**            | 6.68 ± 0.37**            |
| #20                       | 0.09 ± 0.03*                               | 3.63 ± 0.41**            | 8.19 ± 0.46**            |
| #21                       | 0.08 ± 0.02                                | 3.24 ± 0.24**            | 8.17 ± 0.08**            |
| #22                       | 0.04 ± 0.01                                | 2.47 ± 0.22              | 2.69 ± 0.12***           |
| #23                       | 0.06 ± 0.01                                | 3.61 ± 0.24**            | 8.52 ± 0.34              |
| DMSO                      | 0.02 ± 0                                   | --                       | --                       |
| LPS                       | --                                         | 1.61 ± 0.19              | 2.85 ± 0.11              |

<sup>a)</sup> Compounds were evaluated at 5 μM concentration

<sup>b), c)</sup> Statistical significance calculated using one-way ANOVA and Dunnett's multiple comparison test compared to DMSO <sup>b)</sup> or LPS <sup>c)</sup>.

Significant increase is denoted as \*\*, P < 0.01 or \*, P < 0.05 and significant decrease is denoted as \*\*\*, P < 0.01.

**Supplementary Table 3. EC<sub>50</sub> values of selected compounds for enhanced IL-12 and IL-6 production with LPS co-stimulation**

| Compound ID | Subscaffold                | IL-12 EC <sub>50</sub> (μM) <sup>a)</sup> | IL-6 EC <sub>50</sub> (μM) <sup>a)</sup> |
|-------------|----------------------------|-------------------------------------------|------------------------------------------|
| #1          | Fused naphthalene          | 0.23                                      | 0.15                                     |
| #3          | Fused naphthalene          | 1.78                                      | 1.98                                     |
| #4          | Fused naphthalene          | 0.88                                      | 0.69                                     |
| #5          | Fused naphthalene          | 1.91                                      | 2.75                                     |
| #7          | Fused naphthalene          | 0.34                                      | 0.36                                     |
| #8          | Fused naphthalene          | 0.89                                      | 0.79                                     |
| #18         | Fused dimethylaminobenzene | 2.83                                      | 0.61                                     |
| #19         | Fused benzodioxolane       | 0.52                                      | 0.51                                     |
| #20         | Fused benzodioxolane       | 0.73                                      | 0.69                                     |
| #21         | Fused benzodioxolane       | 0.32                                      | 0.19                                     |
| #22         | Fused benzodioxolane       | 0.47                                      | 0.25                                     |

<sup>a)</sup> BMDCs were incubated with decreasing (1:2 dilutions) concentrations of compound (from 10 μM) in the presence of 0.5 ng/mL LPS for 18 h. IL-12 and IL-6 secretion levels were evaluated by ELISA.

**Supplementary Table 4. KEGG pathway analysis from RNA sequencing data**

| Up-regulated genes by #1 treatment compared to vehicle                                                                                                              |         |      |      |            |            |             |                                                                                                                                                                                                                                                                                                                                                                         |
|---------------------------------------------------------------------------------------------------------------------------------------------------------------------|---------|------|------|------------|------------|-------------|-------------------------------------------------------------------------------------------------------------------------------------------------------------------------------------------------------------------------------------------------------------------------------------------------------------------------------------------------------------------------|
| NAME                                                                                                                                                                | # genes | ES   | NES  | NOM. p.val | FDR.q .val | #genes .pos | Genes                                                                                                                                                                                                                                                                                                                                                                   |
| CYTOKINE_CYTOKINE_RECEPTOR_INTERACTION                                                                                                                              | 135     | 0.56 | 2.18 | 0.00       | 0.00       | 46          | LIF,IL8,OSM,IL1B,CXCL2,CCL20,TNFRSF12A,CXCL3,IL1A,IL23A,CCL4,INHBA,TNFRSF9,CXCL1,IL7R,VEGFA,TNFRSF10B,CCL3,TNFSF15,CXCL10,IL1RAP,IL10RA,TNFRSF18,TNF,FLT1,PRLR,PDGFA,IL1R1,CXCL16,IL4R,INHBE,CLCF1,TNFSF9,IL18,IFNGR1,IL2RG,TSLP,CXCR4,CCR7,CSF2RB,TNFRSF10D,ACVR2A,ACVR1,KITLG,TNFRSF1B,IL15                                                                           |
| COMPLEMENT_AND_COAGULATION_CASCADES                                                                                                                                 | 35      | 0.69 | 2.11 | 0.00       | 0.00       | 12          | BDKRB2,PLAU,SERPINE1,PLAUR,CD55,TFPI,C5AR1,C3AR1,THBD,SERPIND1,F3,MASP2                                                                                                                                                                                                                                                                                                 |
| MAPK_SIGNALING_PATHWAY                                                                                                                                              | 203     | 0.49 | 2.02 | 0.00       | 0.00       | 57          | DUSP,NR4A1,IL1B,DUSP8,DUSP2,DUSP4,JUN,IL1A,DUSP16,JUND,DUSP5,NFKB2,RELB,MAP3K14,DUSP10,PLA2G10,TNF,MAPK8IP1,MAP3K8,PDGFA,GADD45B,NFKB1,IL1R1,TRAF6,MAP2K3,CRK,PTP,RR,KRAS,FGF5,GNG12,MAP3K2,FOS,BRAF,CACNA2D2,RPS6KA5,DUSP14,CACNB4,RASA2,GADD45A,MAPK7,DDIT3,PPM1A,RASGRF2,CACNA1F,MAPK8,CACNG8,FLNB,RASGRP1,PPM1B,PLA2G6,MAPKAPK2,SOS2,RAP1B,ATF4,CACNB2,ELK4,MAP3K12 |
| NOD_LIKE_RECEPTOR_SIGNALING_PATHWAY                                                                                                                                 | 55      | 0.59 | 1.95 | 0.00       | 0.01       | 19          | IL8,IL1B,CXCL2,BIRC3,NFKBIA,CXCL1,TNFAIP3,TNF,NFKB1,TRAF6,IL18,RIPK2,NLRP3,MAPK8,BIRC2,XIAP,NOD2,TRIP6,NFKBIB                                                                                                                                                                                                                                                           |
| EPITHELIAL_CELL_SIGNALING_IN_HELICOBACTER_PYLORI_INFECTION                                                                                                          | 60      | 0.53 | 1.79 | 0.00       | 0.04       | 7           | IL8,HBEGF,JUN,NFKBIA,CXCL1,MAP3K14,NFKB1                                                                                                                                                                                                                                                                                                                                |
| JAK_STAT_SIGNALING_PATHWAY                                                                                                                                          | 88      | 0.49 | 1.77 | 0.00       | 0.04       | 15          | LIF,OSM,SOC3,IL23A,STAT4,IL7R,IL10RA,SPRED2,PRLR,PIK3R5,IL4R,CLCF1,IFNGR1,IL2RG,TSLP                                                                                                                                                                                                                                                                                    |
| ES is enrichment score, NES is normalized enrichment score, cut-off $\geq 2$ . Order of gene names: high to lower expression, the most upregulated gene is the top. |         |      |      |            |            |             |                                                                                                                                                                                                                                                                                                                                                                         |

| Down-regulated genes by #1 treatment compared to vehicle                                                                                                         |         |       |       |            |            |             |                                                                                                                                                                                                                                                                                                                                                                                                                                                                                                                                                  |
|------------------------------------------------------------------------------------------------------------------------------------------------------------------|---------|-------|-------|------------|------------|-------------|--------------------------------------------------------------------------------------------------------------------------------------------------------------------------------------------------------------------------------------------------------------------------------------------------------------------------------------------------------------------------------------------------------------------------------------------------------------------------------------------------------------------------------------------------|
| NAME                                                                                                                                                             | # genes | ES    | NES   | NOM. p.val | FDR.q .val | #genes .pos | Genes                                                                                                                                                                                                                                                                                                                                                                                                                                                                                                                                            |
| OXIDATIVE_PHOSPHORYLATION                                                                                                                                        | 103     | -0.47 | -1.97 | 0.00       | 0.02       | 75          | ATP6V1C1,ATP6V1B1,NDUFS5,NDUFS4,NDUFA6,ATP6V1A,NDUFB1,ATP6V0A2,ATP5C1,COX6C,COX5A,NDUFV3,NDUFB3,NDUFA1,NDUFB4,NDUFB2,COX6A1,ATP6V1G1,ATP6AP1,COX7C,SDHB,ATP5L,ATP5J,ATP5I,UQCRCQ,COX4I1,UQCRCF1,NDUFB9,ATP5D,ATP6V1D,NDUFB8,ATP5J2,COX6B1,SDHC,ATP6V1E1,TCIRG1,COX15,COX5B,ATP5B,UQCRC11,ATP5F1,ATP5A1,COX8A,NDUFS6,ATP5O,NDUFB1,ATP6V0B,NDUFV1,NDUFV2,NDUFA3,NDUFA4,NDUFA9,COX11,NDUFB10,NDUFS2,NDUFS1,NDUFA2,ATP5G2,ATP6V0D1,ATP6V0E1,ATP5G1,NDUFS3,ATP5H,ATP5G3,UQCRC10,NDUFS8,SDHA,NDUFA8,NDUFA11,NDUFB7,CYC1,NDUFS7,ATP5E,NDUFA4L2,ATP6V0E2 |
| DNA_REPLICATION                                                                                                                                                  | 35      | -0.54 | -1.83 | 0.00       | 0.06       | 25          | RFC1,RPA2,SSBP1,POLD4,POLE3,RFC5,LIG1,RNA,SEH2C,POLE2,POLE,MCM7,PCNA,PRIM1,POLD1,MCM6,RFC2,POLD2,FEN1,MCM4,MCM5,POLA2,RNASEH2A,RPA1,MCM3,MCM2                                                                                                                                                                                                                                                                                                                                                                                                    |
| PEROXISOME                                                                                                                                                       | 70      | -0.45 | -1.77 | 0.00       | 0.06       | 34          | SLC25A17,ABCD3,SCP2,CAT,CRAT,PRDX1,PXMP2,ACOT8,SLC27A2,ECH1,DDO,GSTK1,IDH2,MPV17L,PEX26,MLYCD,NUDT12,PEX3,PEX11B,PEX11G,DHRS4,HMGCL,ABCD1,PEX10,PEX12,PIPOX,PMVK,CROT,PEX11A,EHHADH,PXMP4,IDH1,PAOX,AMACR                                                                                                                                                                                                                                                                                                                                        |
| BASE_EXCISION_REPAIR                                                                                                                                             | 33      | -0.52 | -1.72 | 0.00       | 0.07       | 23          | POLD4,POLE3,XRCC1,POLB,HMGB1,LIG1,MPG,POLE2,NEIL3,POLE,PCNA,POLL,POLD1,LIG3,POLD2,OGG1,FEN1,APEX2,SMUG1,APEX1,UNG,NTHL1,PARP1                                                                                                                                                                                                                                                                                                                                                                                                                    |
| MISMATCH_REPAIR                                                                                                                                                  | 22      | -0.58 | -1.71 | 0.00       | 0.07       | 16          | RFC1,RPA2,SSBP1,POLD4,RFC5,EXO1,LIG1,PCNA,POLD1,RFC2,MLH3,POLD2,MSH2,MSH6,RPA1,PMS2                                                                                                                                                                                                                                                                                                                                                                                                                                                              |
| HISTIDINE_METABOLISM                                                                                                                                             | 18      | -0.58 | -1.68 | 0.00       | 0.07       | 7           | ALDH3A2,ALDH9A1,LCMT2,ABP1,ALDH3B1,ACY3,ALDH1A3                                                                                                                                                                                                                                                                                                                                                                                                                                                                                                  |
| ES is enrichment score, NES is normalized enrichment score, cut-off $\geq 2$ . Order of gene names: high to low expression, most down-regulated gene is the last |         |       |       |            |            |             |                                                                                                                                                                                                                                                                                                                                                                                                                                                                                                                                                  |
